# Supplementary material for: Improved T cell receptor antigen pairing through data-driven filtering of sequencing information from single cells
Source: eLife. 2023 May 3;12:e81810. doi: 10.7554/eLife.81810 (PMC10156162; doi:10.7554/eLife.81810)
Supplement: Supplementary file 2. — Information on the applied pMHC multimers. The full oligonucleotide tag are designed as follows: Biotin-C6-CGGAGATGTGTATAAGAGACAGNNNNNNNNNNXXXXXXXXXXXXXXXNNNNNNNNNCCCATATAAGAAA, with the barcode sequence indicated by 15 purple X’s. C6 indicates a six carbon spacer with a hydroxyl to the 5′ end of an oligonucleotide. Read2N is indicated by the black sequence, UMIs are indicated in gray, and the capture oligo is indicated in turquoise. [file elife-81810-supp2.xlsx]

## Sheet: Ark1
Peptide	HLA	Origin	Barcode sequence	Fluorochrome
CLGGLLTMV	A0201	EBV LMP2	TATGAGGACGAATCT	APC
FLYALALLL	A0201	EBV LMP2	CCGATGTTGACGGAC	APC
YVLDHLIVV	A0201	EBV BRLF1	TAGTAGTTCAGACGC	APC
VLEETSVML	A0201	CMV IE-1	CCGTACCTAGATACA	APC
RVRAYTYSK	A0301	EBV BRLF1	GGTATGGCACGCCTA	APC
RPHERNGFTVL	B0702	CMV pp65	GGATGCATGATCTAG	APC
TPSVSSSISSL	B0702	EBV BFRF3	GATTCAATATGTGTC	APC
RPPIFIRRL	B0702	EBV EBNA3A	GGTAACTGCGCATAG	APC
TPRVTGGGAM	B0702	CMV pp65	GGTACAGTAAGTGAG	APC
RPHERNGFTV	B0702	CMV pp65	GCCACCTTAACACGC	APC
GILGFVFTL	A0201	Flu M1	TTCTATTCTAAGCCG	PE
GLCTLVAML	A0201	EBV BMFL1	TCCAAGTTAGCTTAC	PE
NLVPMVATV	A0201	CMV pp65	CTGTTAATTAGGCTC	PE
