# Supplementary material for: Improved T cell receptor antigen pairing through data-driven filtering of sequencing information from single cells
Source: eLife. 2023 May 3;12:e81810. doi: 10.7554/eLife.81810 (PMC10156162; doi:10.7554/eLife.81810)
Supplement: Supplementary file 3. — Information on the CDR3 sequences that matched the CDR3 sequences of the IEDB and VDJ databases presented in Figure 2d. Six different clonotypes (ct) had CDR3 sequence matches. Five of the clonotypes also matched (T:True) the database on the annotated pMHC (DB Match), while one clonotype (ct 573) had conflicting annotations. [file elife-81810-supp3.xlsx]

## Sheet: Ark1
ct	CDR3 TRA	genes TRA	CDR3 TRB	genes TRB	peptide MHC	# GEMs	DB Match
76	CATEGDSGYSTLTF	TRAV17;TRAJ11;TRAC	CASSYQGGNYGYTF	TRBV6-5;;TRBJ1-2;TRBC1	FLYALALLL A0201	4	T
278	CALYNTDKLIF	TRAV9-2;TRAJ34;TRAC	CASSPTSGSVYEQYF	TRBV3-1;;TRBJ2-7;TRBC2	GLCTLVAML A0201	1	T
478	CAEDNNARLMF	TRAV5;TRAJ31;TRAC	CSARDGTGNGYTF	TRBV20-1;TRBD1;TRBJ1-2;TRBC1	GLCTLVAML A0201	1	T
574	CAESIGKLIF	TRAV5;TRAJ37;TRAC	CSVGAGGTNEKLFF	TRBV29-1;;TRBJ1-4;TRBC1	RVRAYTYSK A0301	1	F
1140	CATEGDSGYSTLTF	TRAV17;TRAJ11;TRAC	CASSLQGGNYGYTF	TRBV6-5;;TRBJ1-2;TRBC1	FLYALALLL A0201	1	T
1984	CIRDNNNDMRF	TRAV26-2;TRAJ43;TRAC	CASSLAPGATNEKLFF	TRBV7-6;;TRBJ1-4;TRBC1	NLVPMVATV A0201	1	T
1985	CILDNNNDMRF	TRAV26-2;TRAJ43;TRAC	CASSLAPGATNEKLFF	TRBV7-6;;TRBJ1-4;TRBC1	NLVPMVATV A0201	1	T
