# Supplementary material for: Improved T cell receptor antigen pairing through data-driven filtering of sequencing information from single cells
Source: eLife. 2023 May 3;12:e81810. doi: 10.7554/eLife.81810 (PMC10156162; doi:10.7554/eLife.81810)
Supplement: Supplementary file 4. — The frequency or summed number of gel-beads in emulsion (GEMs) for all pMHCs reported in Figure 7. The frequency found by fluorescent-based methods is utilized to calculate a proportion of each response per donor ((sum of responses in donor/100) × % of pMHC-specific T cells) and then the estimated number of cells of each specificity sorted for the single-cell analyses ((total number of cells sorted × proportion)/100). In all cases, a total of 1800 cells were sorted. Approximately 45% of sorted cells are lost already before loading on 10x, and 50% more are expected to be lost during 10x processing. Responses reported in italic are below the detection limit for the fluorescent-based method but represent cases where >1 event are detected for that specificity. NA, not applicable. [file elife-81810-supp4.xlsx]

## Sheet: Sheet1
BC	HLA	peptide	pMHC multimer screen	Calculations		S-C screen
			Frequency (% of total CD8)	Proportion of sorted cells	Est # of cells	sum of pMHC-GEM
314
	A0702	RPHERNGFTVL	2.4209	86.9295	1564.73	158
	A0702	TPSVSSSISSL	0.0191	0.685842	12.3451	3
	A0301	RVRAYTYSK	0.0104	0.373442	6.72196	20
	A0702	RPPIFIRRL	0.0035	0.125678	2.2622	1
	A0702	TPRVTGGGAM	0.331	11.8855	213.939	82
		Sum of responses	2.7849	100		264
316
	A0201	CLGGLLTMV	0.0273	69.1139	1244.05
	A0201	FLYALALLL	0.0094	23.7975	428.354	2
	A0201	YVLDHLIVV	0.0028	7.08861	127.595	2
	A0201	VLEETSVML				6
		Sum of responses	0.0395	100		10
328
	A0702	RPHERNGFTV				1
	A0702	RPHERNGFTVL				1
	A0702	TPSVSSSISSL	0.168275	14.7701	265.862	10
	A0301	RVRAYTYSK	0.260487	22.864	411.552	109
	A0702	RPPIFIRRL	0.710529	62.3659	1122.59	57
		Sum of responses	1.13929	100		178
353
	A0702	RPHERNGFTVL	0.1356	6.36351	114.543	13
	A0301	RVRAYTYSK	0.8	37.5428	675.771	47
	A0702	RPPIFIRRL				1
	A0702	TPRVTGGGAM	1.1953	56.0937	1009.69	209
		Sum of responses	2.1309	100		270
355
	A0201	CLGGLLTMV	0.0225	3.67827	66.2089	4
	A0201	FLYALALLL	0.012	1.96175	35.3114	1
	A0201	YVLDHLIVV	0.0442	7.22576	130.064	9
	A0201	VLEETSVML	0.009	1.47131	26.4836	2
	A0702	RPHERNGFTVL	0.3144	51.3977	925.159	14
	A0702	TPSVSSSISSL	0.0329	5.37845	96.8122	4
	A0702	RPPIFIRRL				5
	A0702	TPRVTGGGAM	0.1767	28.8867	519.961	26
	A0702	RPHERNGFTV				1
		Sum of responses	0.6117	100		66
360
	A0702	RPHERNGFTVL	1.5605	76.1442	1370.6	79
	A0702	TPSVSSSISSL	0.0173	0.84415	15.1947	2
	A0702	RPPIFIRRL				1
	A0702	TPRVTGGGAM	0.4716	23.0116	414.209	173
	A0702	RPHERNGFTV				1
		Sum of responses	2.0494	100		256
62
	A0702	RPHERNGFTVL	0.0106	0.290378	5.22681
	A0702	TPSVSSSISSL	0.0639	1.75049	31.5088	9
	A0301	RVRAYTYSK	0.4045	11.0809	199.457	91
	A0702	RPPIFIRRL	3.17141	86.8782	1563.81	37
	A0702	TPRVTGGGAM				1
		Sum of responses	3.65041	100		138
300
	A0201	CLGGLLTMV	0.2698	27.4187	493.537	11
	A0201	FLYALALLL	0.0532	5.4065	97.3171	2
	A0201	YVLDHLIVV	0.6558	66.6463	1199.63	7
	A0201	VLEETSVML	0.001	0.101626	1.82927	2
	A0702	RPHERNGFTVL				1
	A0702	TPSVSSSISSL	0.0042	0.426829	7.68293	4
	A0702	RPPIFIRRL				2
	A0702	TPRVTGGGAM				16
	A0702	RPHERNGFTV				2
		Sum of responses	0.984	100		47
126
	A0201	CLGGLLTMV	0.0094	2.4588	44.2584	4
	A0201	FLYALALLL	0.0126	3.29584	59.3251	5
	A0201	YVLDHLIVV	0.0928	24.2741	436.934	37
	A0201	VLEETSVML	0.2675	69.9712	1259.48	134
		Sum of responses	0.3823	100		180
88						hash 10
	A0201	CLGGLLTMV	0.003	14.1509	254.717	NA
	A0201	FLYALALLL	0.0046	21.6981	390.566	NA
	A0201	YVLDHLIVV	0.003	14.1509	254.717	NA
	A0201	VLEETSVML	0.0106	50	900	NA
		Sum of responses	0.0212	100
83	A0201	FLYALALLL	0.06	14.2857	257.143	hash 10
	A0201	YVLDHLIVV	0.36	85.7143	1542.86	NA
		Sum of responses	0.42	100
11						hash 10
	A0201	CLGGLLTMV	0.0041	0.771112	13.88	NA
	A0201	FLYALALLL	0.0219	4.11886	74.1396	NA
	A0201	YVLDHLIVV	0.4961	93.3045	1679.48	NA
	A0301	RVRAYTYSK	0.0096	1.80553	32.4995	NA
		Sum of responses	0.5317	100
76						hash 10
	A0301	RVRAYTYSK	0.0332	100	1800	NA
		Sum of responses	0.0332	100
			3012.05
342						hash 10
	A0301	RVRAYTYSK	0.00976158	100	1800	NA
		Sum of responses	0.00976158	100
311	HLA	sequence	Freq			hash 10
	A0201	CLGGLLTMV	0.4658	45.707	822.726	NA
	A0201	FLYALALLL	0.0283	2.77696	49.9853	NA
	A0201	YVLDHLIVV	0.5163	50.6623	911.922	NA
	A0702	TPSVSSSISSL	0.0062	0.60838	10.9508	NA
	A0301	RVRAYTYSK	0.0025	0.245314	4.41566	NA
		Sum of responses	1.0191	100
341						hash 10
	A0201	CLGGLLTMV	0.0427	0.145948	2.62706	NA
	A0201	FLYALALLL	0.0046	0.0157227	0.283009	NA
	A0201	YVLDHLIVV	0.0901	0.30796	5.54329	NA
	A0201	VLEETSVML	25.7109	87.8795	1581.83	NA
	A0702	RPHERNGFTVL	0.2655	0.907475	16.3346	NA
	A0702	TPRVTGGGAM	3.127	10.688	192.385	NA
		Sum of responses	29.257	100
SUM of individual screenings_all_Hash10
	A0201	CLGGLLTMV	NA	NA	1318.55	87
	A0201	FLYALALLL	NA	NA	723.641	23
	A0201	YVLDHLIVV	NA	NA	4361.87	222
	A0201	VLEETSVML	NA	NA	2370.2	258
	A0702	RPHERNGFTVL	NA	NA	16.3339	8
	A0702	TPSVSSSISSL	NA	NA	11.9346	5
	A0301	RVRAYTYSK	NA	NA	3574.19	694
	A0702	RPPIFIRRL	NA	NA		6
	A0702	TPRVTGGGAM	NA	NA	192.377	89
	A0702	RPHERNGFTV	NA	NA		9
