# Supplementary material for: Improved T cell receptor antigen pairing through data-driven filtering of sequencing information from single cells
Source: eLife. 2023 May 3;12:e81810. doi: 10.7554/eLife.81810 (PMC10156162; doi:10.7554/eLife.81810)
Supplement: Supplementary file 5. — Summary of specificity singlets, that is, specificities only supported by one gel-bead in emulsion (GEM). The three columns of singlet frequencies correspond to the data plotted in Figure 6a–c which represent: (a) raw data, (b) data filtered on unique molecular identifier (UMI) thresholds and HLA match, and (c) data filtered on UMI thresholds, HLA match, and only contains complete TCRs (TCRαβ). A singlet frequency of 1.0 corresponds to 100% specificity singlets. [file elife-81810-supp5.xlsx]

## Sheet: Ark1
pMHC	Singlet freq (Fig. 6a)	Singlet freq (Fig. 6b)	Singlet freq (Fig. 6c)
RPHERNGFTVL B0702	0.73	0.66	0.68
RVRAYTYSK A0301	0.83	0.86	0.88
CLGGLLTMV A0201	0.78	0.76	0.77
TPRVTGGGAM B0702	0.79	0.74	0.77
YVLDHLIVV A0201	0.7	0.66	0.66
TPSVSSSISSL B0702	0.87	0.78	0.74
VLEETSVML A0201	0.83	0.77	0.7
RPHERNGFTV B0702	0.95	1.0	1.0
RPPIFIRRL B0702	0.89	0.82	0.81
FLYALALLL A0201	0.76	0.68	0.72
NLVPMVATV A0201	1.0	1.0	1.0
GILGFVFTL A0201	1.0	1.0	1.0
GLCTLVAML A0201	0.87	0.88	1.0
